# Supplementary material
Source: ML conference proceedings conference paper supplement (https://proceedings.neurips.cc/paper_files/paper/2018/hash/3e9f0fc9b2f89e043bc6233994dfcf76-Abstract.html)
Supplement: Supplementary file [file 3e9f0fc9b2f89e043bc6233994dfcf76-Supplemental.zip]

## A Appendix

### A.1 Data Processing

**MNIST/CIFAR10.** We use the original MNIST and CIFAR10 datasets with standard mean and variance normalization, using 10% of the training split for validation.

**UCI.** We use standard mean and variance scaling on all datasets and use (80%, 10%, 10%) train, validation and test splits.

**COMPAS** We preprocess the data by rescaling the ordinal variable `Number_of_priors` to the range  $[0, 1]$ . The data contains several inconsistent examples, so we filter out examples whose label differs from a strong (80%) majority of other identical examples.

### A.2 Architectures

The architectures used for SENN in each task are summarized below, where CL/FC stand for convolutional and fully-connected layers, respectively, and  $c$  denotes the number of concepts. Note that in every case we use more complex architectures for the parametrizer than the concept encoder.

| COMPAS/UCI      |                 | MNIST                                       | CIFAR10                                                                    |
|-----------------|-----------------|---------------------------------------------|----------------------------------------------------------------------------|
| $h(\cdot)$      | $h(x) = x$      | CL(10, 20) $\rightarrow$ FC( $c$ )          | CL(10, 20) $\rightarrow$ FC( $c$ )                                         |
| $\theta(\cdot)$ | FC(10, 5, 5, 1) | CL(10, 20) $\rightarrow$ FC( $c \cdot 10$ ) | CL( $2^6, 2^7, 2^8, 2^9, 2^9$ ) $\rightarrow$ FC( $2^8, 2^7, c \cdot 10$ ) |
| $g(\cdot)$      | sum             | sum                                         | sum                                                                        |

In all cases, we train using the Adam optimizer with initial learning rate  $l = 2 \times 10^{-4}$  and, whenever learning  $h(\cdot)$ , sparsity strength parameter  $\xi = 2 \times 10^{-5}$ .

### A.3 Predictive Performance of SENN

**MNIST.** We observed that any reasonable choice of parameters in our model leads to very low test prediction error ( $< 1.3\%$ ). In particular, taking  $\lambda = 0$  (the unregularized model) yields an unconstrained model with an architecture slightly modified from LeNet, for which we obtain a 99.11% test set accuracy (slightly above typical results for a vanilla LeNet). On the other hand, for the most extreme regularization value used ( $\lambda = 1$ ) we obtain an accuracy of 98.7%. All other values interpolate between these two extremes. In particular, the actual model used in Figure 2 obtained 99.03% accuracy, just slightly below the unregularized one.

**UCI.** As with previous experiments, our models are able to achieve competitive performance on all UCI datasets for most parameter configurations.

**COMPAS.** With default parameters, our SENN model achieves an accuracy of 82.02% on the test set, compared to 78.54% for a baseline logistic classification model. The relatively low performance of both methods is due to the problem of inconsistent examples mentioned above.

**CIFAR10.** With default parameters, our SENN model achieves an accuracy of 78.56% on the test set, which is on par for models of that size trained with some regularization method (our method requires no further regularization).

### A.4 Implementation and dependency details

We used the implementations of LIME and SHAP provided by the authors. Unless otherwise stated, we use default parameter configurations and  $n = 100$  estimation samples for these two methods. For the rest of the interpretability frameworks, we use the publicly available DeepExplain<sup>2</sup> toolbox.

In our experiments, we compute  $\hat{L}_i$  for SENN models by minimizing a Lagrangian relaxation of (5) through backpropagation. For all other methods, we rely instead on Bayesian optimization, via the skopt<sup>3</sup> toolbox, using a budget of 40 function calls for LIME (due to higher compute time) and 200 for all other methods.

<sup>2</sup>[github.com/marcoancona/DeepExplain](https://github.com/marcoancona/DeepExplain)

<sup>3</sup>[scikit-optimize.github.io](https://scikit-optimize.github.io)

## A.5 Qualitative results on CIFAR10

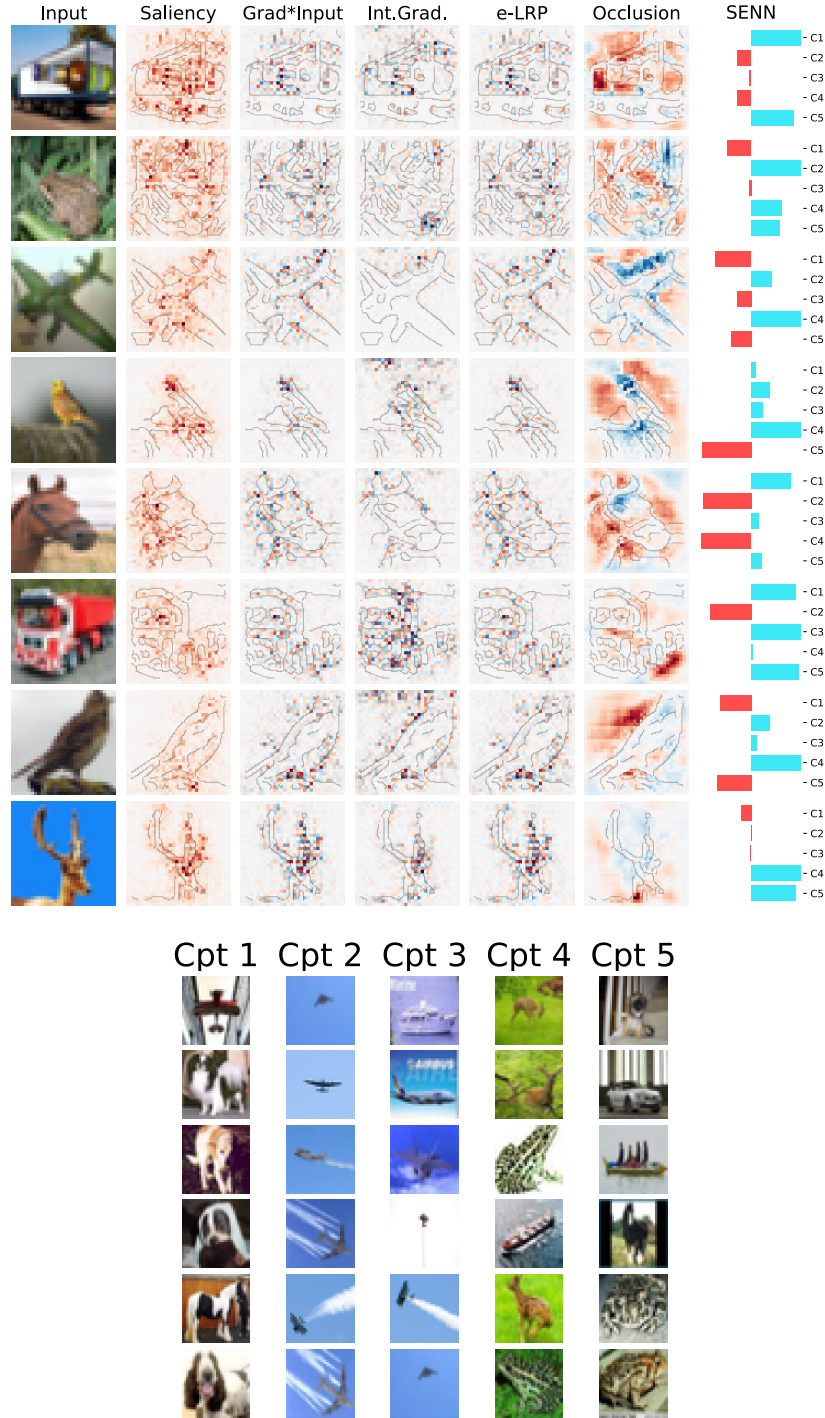

Figure 6: Explaining a CNN classifier on CIFAR10. **Top:** The attribution scores for various interpretability methods. **Bottom:** The concepts learnt by this SENN instance on CIFAR10 are characterized by conspicuous dominating colors and patterns (e.g., stripes and vertical lines in Concept 5, shown in the right-most column). All examples are correctly predicted by SENN, except the last one, in which it predicts `ship` instead of `deer`. The explanation provided by the model suggests it was fooled by a blue background which speaks against the `deer` class.

## A.6 Additional Results on Stability

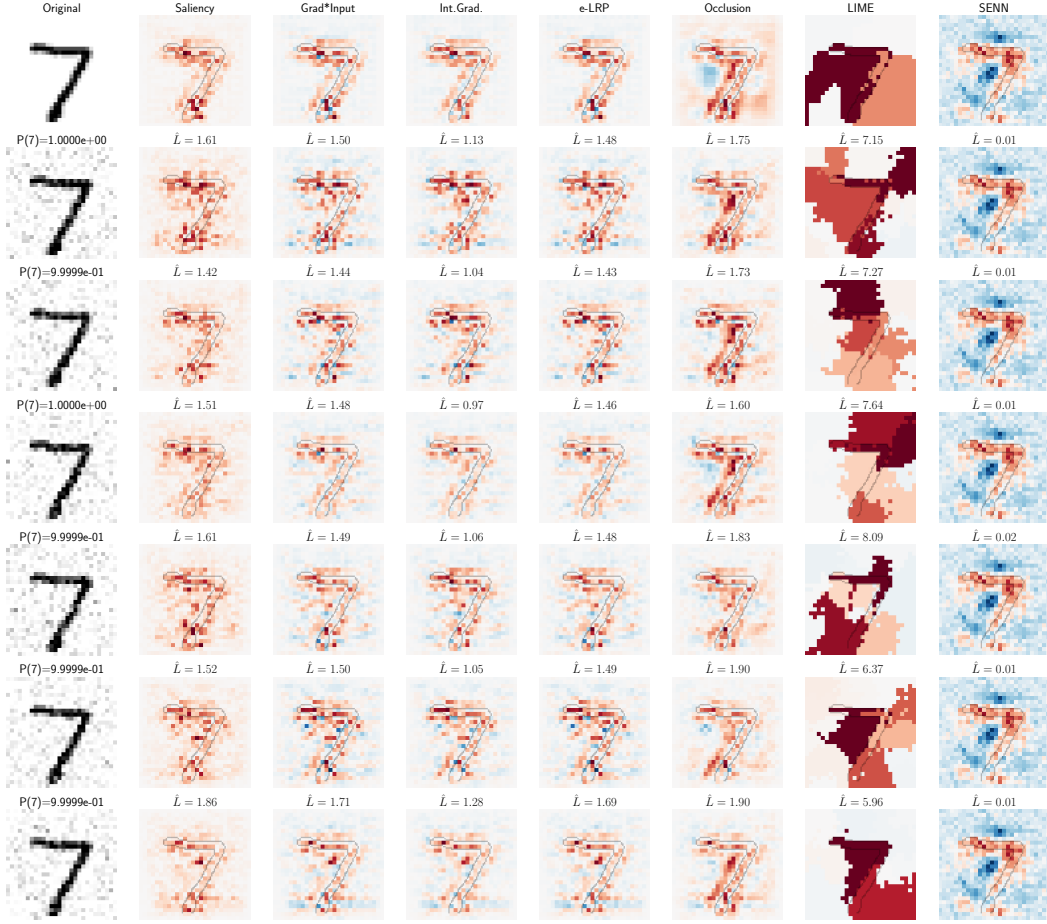

Figure 7: The effect of gaussian perturbations on the explanations of various interpretability frameworks. For every explainer  $f_{\text{expl}}$ , we show the relative effect of the perturbation in the explanation:  $\hat{L} = \|f_{\text{expl}}(x) - f_{\text{expl}}(\tilde{x})\|/\|x - \tilde{x}\|$ .

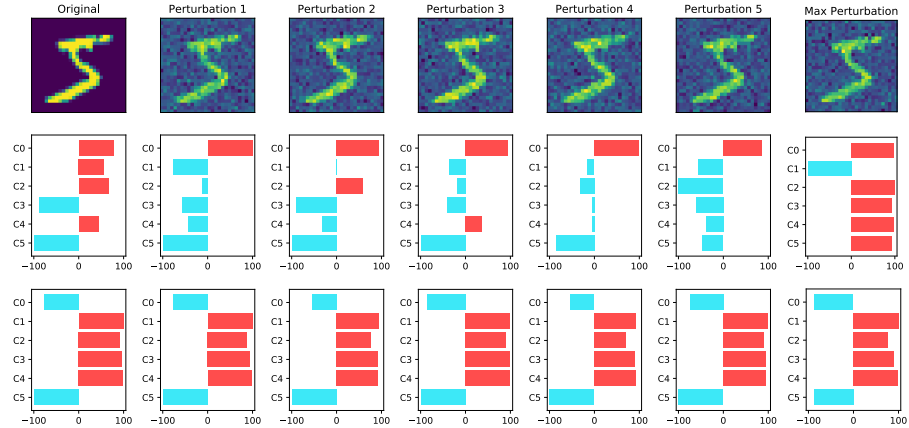

Figure 8: **Left:** The effect of gradient-regularization on explanation stability. The unregularized version (second row) produces highly variable, sometimes contradictory, explanations for slight perturbations of the same input. Regularization ( $\lambda = 2 \times 10^{-4}$ ) leads to more robust explanations.

## A.7 Adversarial Examples For Interpretability

We now show various examples inputs and their adversarial perturbation (according to (5)) on various datasets.

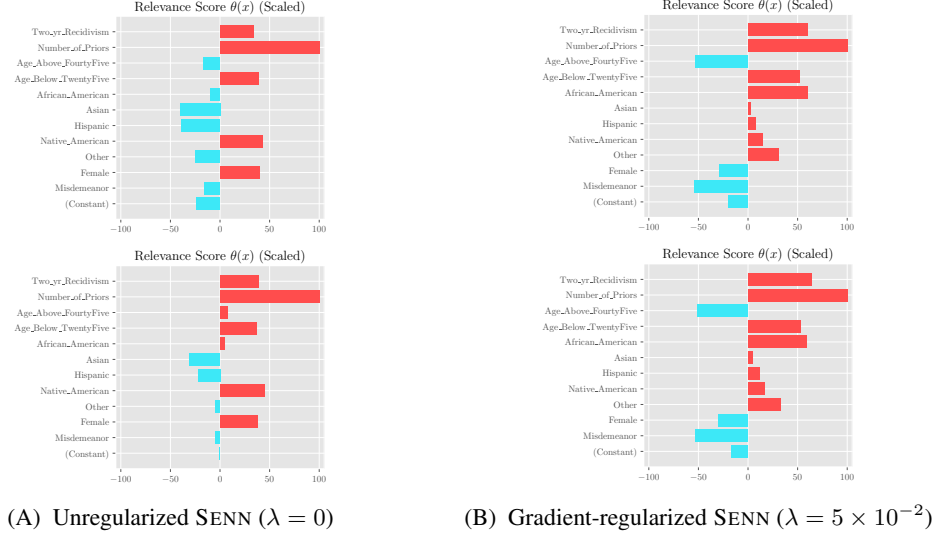

Figure 9: Prediction explanation for two individuals differing in only on the protected variable (African\_American) in the COMPAS dataset. The method trained with gradient regularization (column B) yields more stable explanations, consistent with each other for these two individuals.

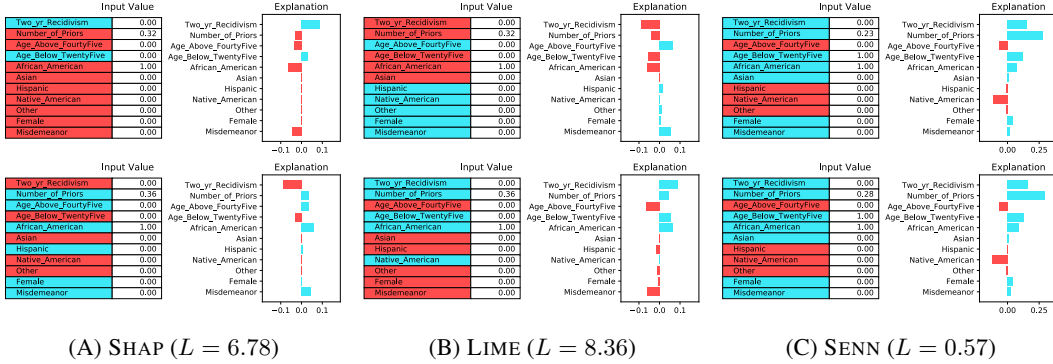

Figure 10: Adversarial examples (i.e., the maximizer argument in the discrete version of (5)) for SHAP, LIME and SENN on COMPAS. Both are true examples are from the test fold.

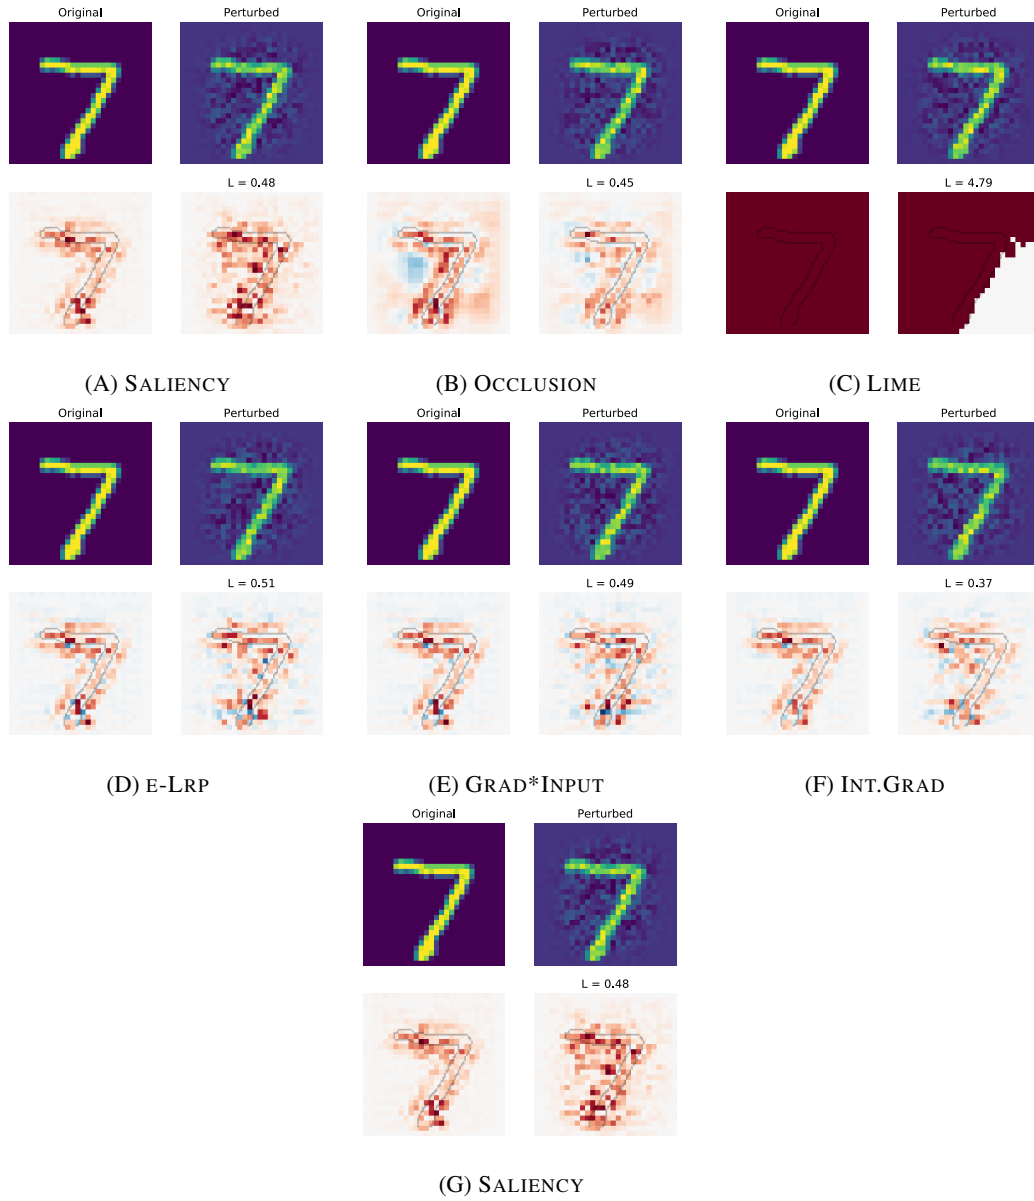

Figure 11: Adversarial examples (i.e., the maximizer argument in (5)) for various interpretability methods on MNIST.

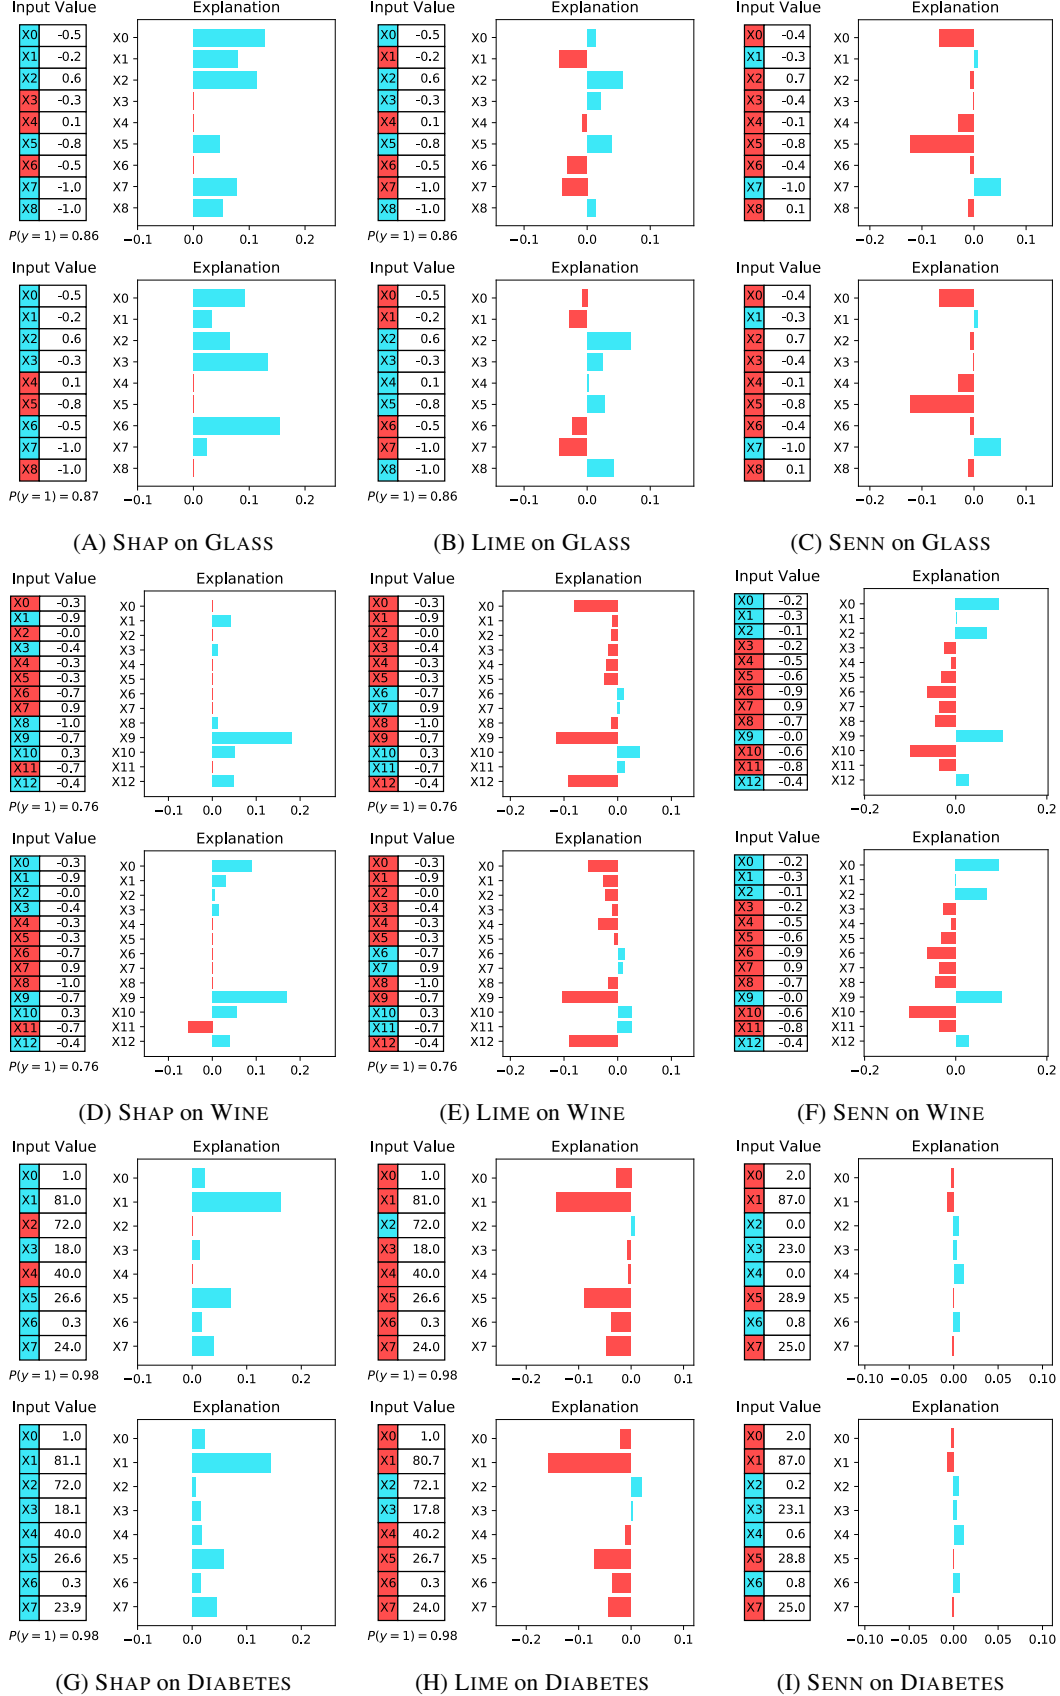

Figure 12: Adversarial examples (i.e., the maximizer argument in (5)) for SHAP, LIME and SENN on various UCI datasets.
